# Supplementary material for: Knockdown of BAP31 Downregulates Galectin-3 to Inhibit the Wnt/β-Catenin Signaling Pathway to Modulate 5-FU Chemosensitivity and Cancer Stemness in Colorectal Cancer
Source: MDPI journal article supplement (doi:10.3390/ijms241814402), 2023-09-21
Supplement: s1 [file s1]

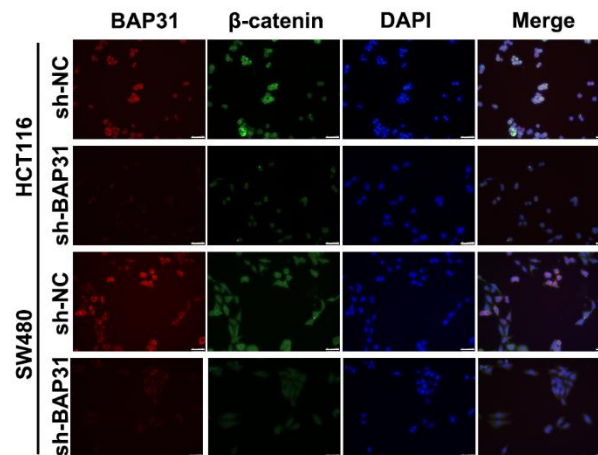

**Figure S1.** Immunofluorescence determined the distribution of BAP31 (Red) and  $\beta$ -catenin (Green). Scale bars: 250  $\mu$ m. Nuclei were stained with DAPI (Blue).

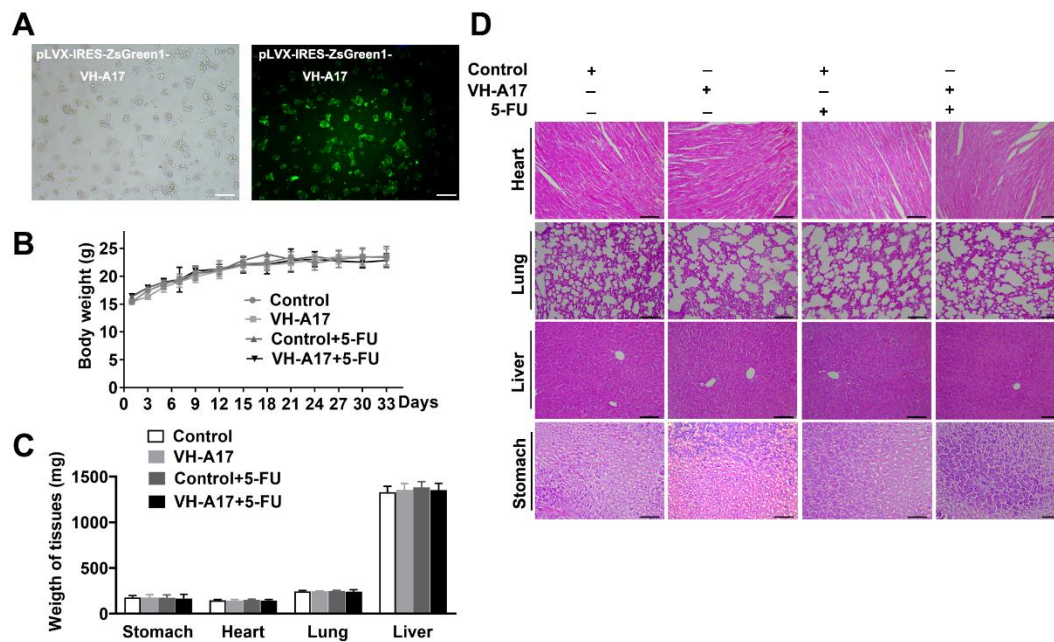

**Figure S2.** (A) The fluorescence of ZsGreen1 in HCT116 cells was observed after 72 h of transduction with lentivirus (pLVX-IRES-ZsGreen1-VH-D1). Scale bars, 100  $\mu$ m. (B) The weight of mice was monitored every three days in the different treatment groups. (C) Weight of stomach, heart, liver and lung changes in mice after treatment. (D) H&E staining of stomach, lungs, hearts and livers from mice treated with different groups. Scale bars, 100  $\mu$ m.
